# Supplementary material for: Rapid size-dependent separation of CdTe quantum dots with prion protein
Source: Royal Society of Chemistry journal article supplement (doi:10.1039/c6ra05419f), 2016-01-01
Supplement: c6ra05419f1.pdf [file c6ra05419f1.pdf]

**<Electronic Supplementary Information>**

**Rapid size-dependent separation of CdTe quantum dots  
with prion protein**

**Lingyan Zhang<sup>a,b</sup>, Yijuan Long<sup>a</sup>, Huzhi Zheng<sup>a\*</sup>**

<sup>a</sup> Key Laboratory of Luminescent and Real-Time Analytical Chemistry (Southwest University), Ministry of Education, College of Chemistry and Chemical Engineering, Southwest University, Chongqing, 400715, P. R. China.

\*Corresponding Author. Fax: +86-23-68254000 ; Tel: +86-23-68252360 ; E-mail address: [zhenghz@swu.edu.cn](mailto:zhenghz@swu.edu.cn)

<sup>b</sup> School of Public Health, Baotou Medical College, Baotou, 014060, P. R. China

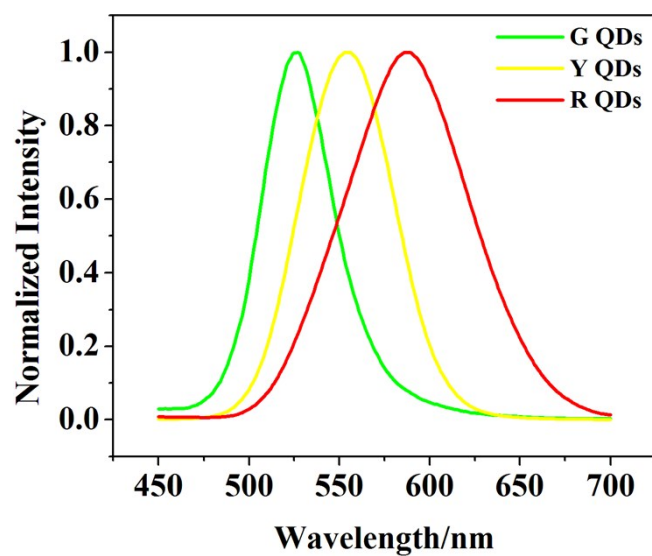

Fig. S1. Normalized fluorescence spectra of G QDs (green), Y QDs (yellow) and R QDs (red). The concentration of QDs in each solution was  $1.0 \times 10^{-6}$  mol L<sup>-1</sup> and the excitation wavelength was 360 nm.

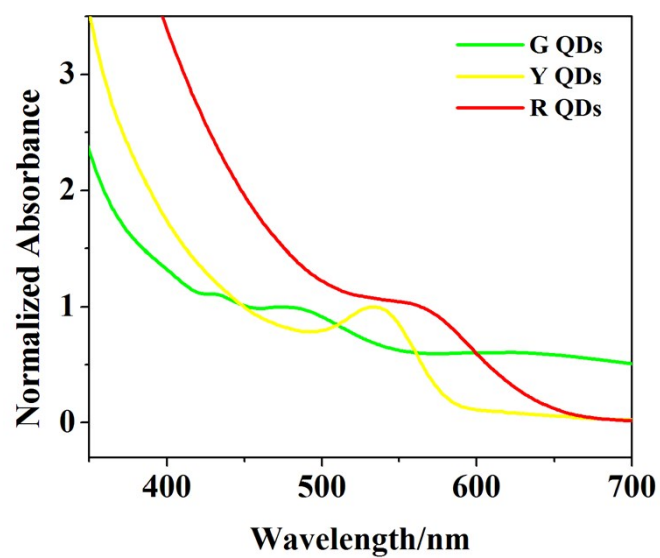

Fig. S2. Normalized absorption spectra of G QDs (green line), Y QDs (yellow line) and R QDs (red line). The concentration of QDs in each solution was  $1.0 \times 10^{-6} \text{ mol L}^{-1}$ .

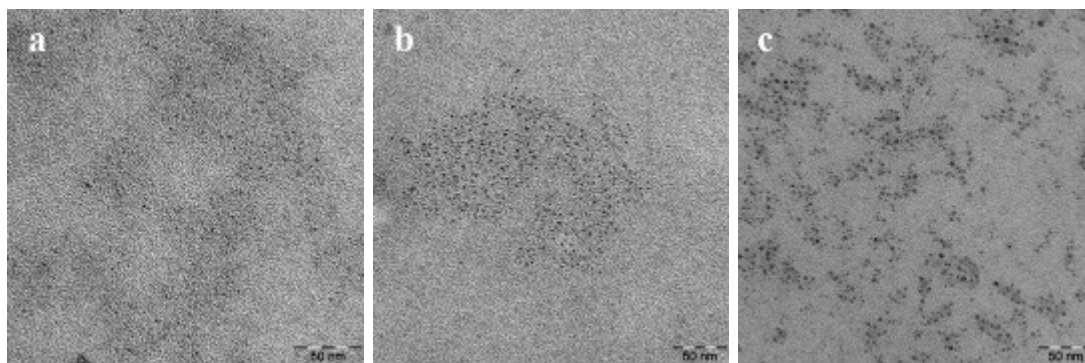

Fig. S3. TEM images of original CdTe QDs (a) G QDs, (b) Y QDs, and (c) R QDs.

Scale bar = 50 nm.

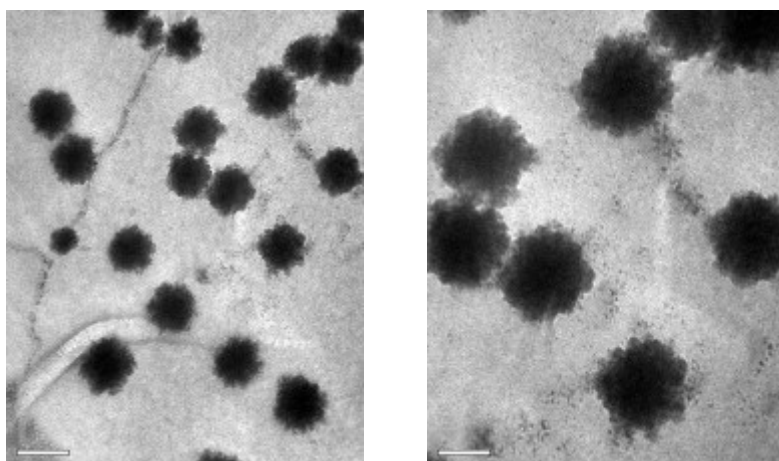

Fig. S4. TEM images of R QDs precipitated by PrP. The precipitate was dispersed in ultrapure water. The concentration of QDs was  $1.0 \times 10^{-6}$  mol L<sup>-1</sup>, and the concentration of PrP was 480 nmol L<sup>-1</sup>. Left: scale bar = 100 nm; Right: amplified view of left image, scale bar = 50 nm.

**Table S1** FWHM of QDs

| Sample                            | G QDs | Y QDs | R QDs |
|-----------------------------------|-------|-------|-------|
| FWHM of pure QDs (nm)             | 46    | 60    | 104   |
| FWHM of QDs after separation (nm) | 50    | 60    | 94    |
